# Supplementary material for: The Current Research Landscape of the Application of Artificial Intelligence in Managing Cerebrovascular and Heart Diseases: A Bibliometric and Content Analysis
Source: PubMed Central journal article supplement (PMC6696240; doi:10.3390/ijerph16152699), 2019-07-29
Supplement: ijerph-16-02699-s001.pdf [file ijerph-16-02699-s001.pdf]

## APPENDIX

**Figure S1.** The coincidence of research areas using the WoS classifications (Principle component analysis).

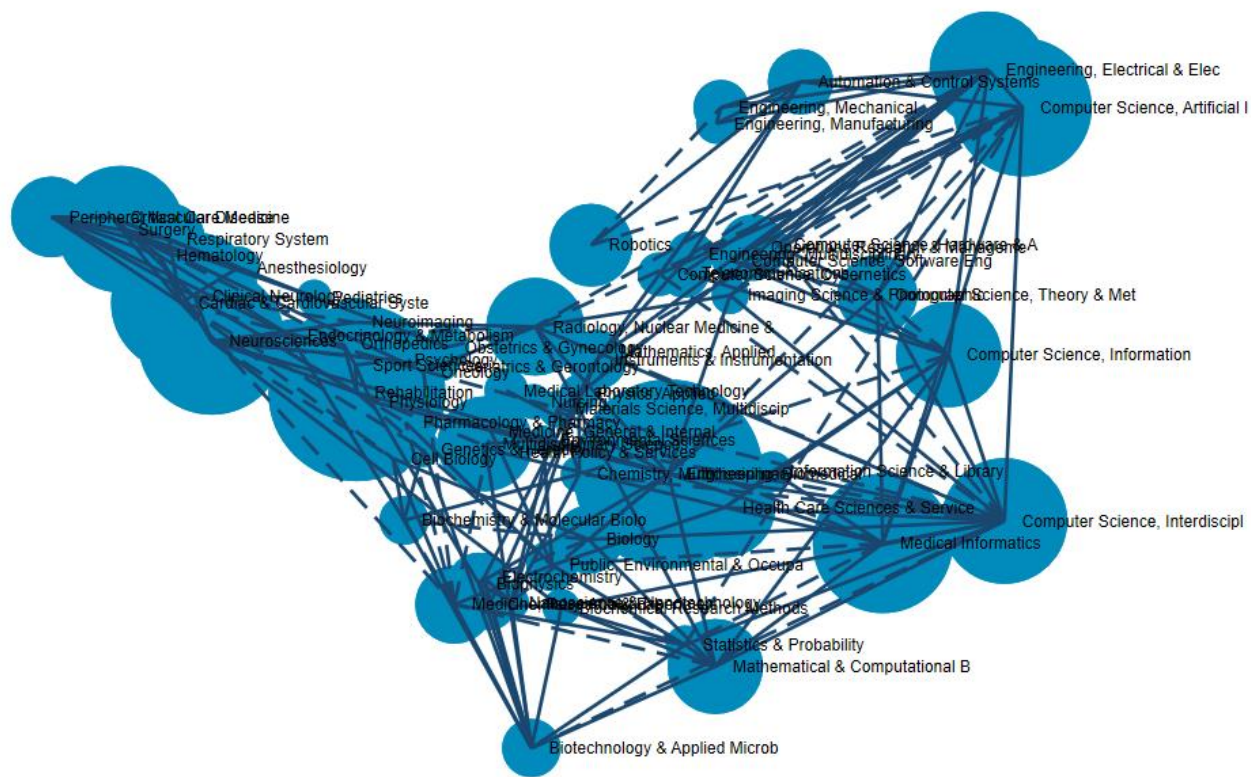

Each node shows the research area and its size represents the number of papers related to this discipline. A straight line means that the relationship is strong; while a dashed line shows the weak relationship.
